# Supplementary material for: A novel antibiotic class targeting the lipopolysaccharide transporter
Source: PubMed Central journal article supplement (PMC10794144; doi:10.1038/s41586-023-06873-0), 2024-01-03
Supplement: 41586_2023_6873_MOESM3_ESM.pdf [file 41586_2023_6873_MOESM3_ESM.pdf]

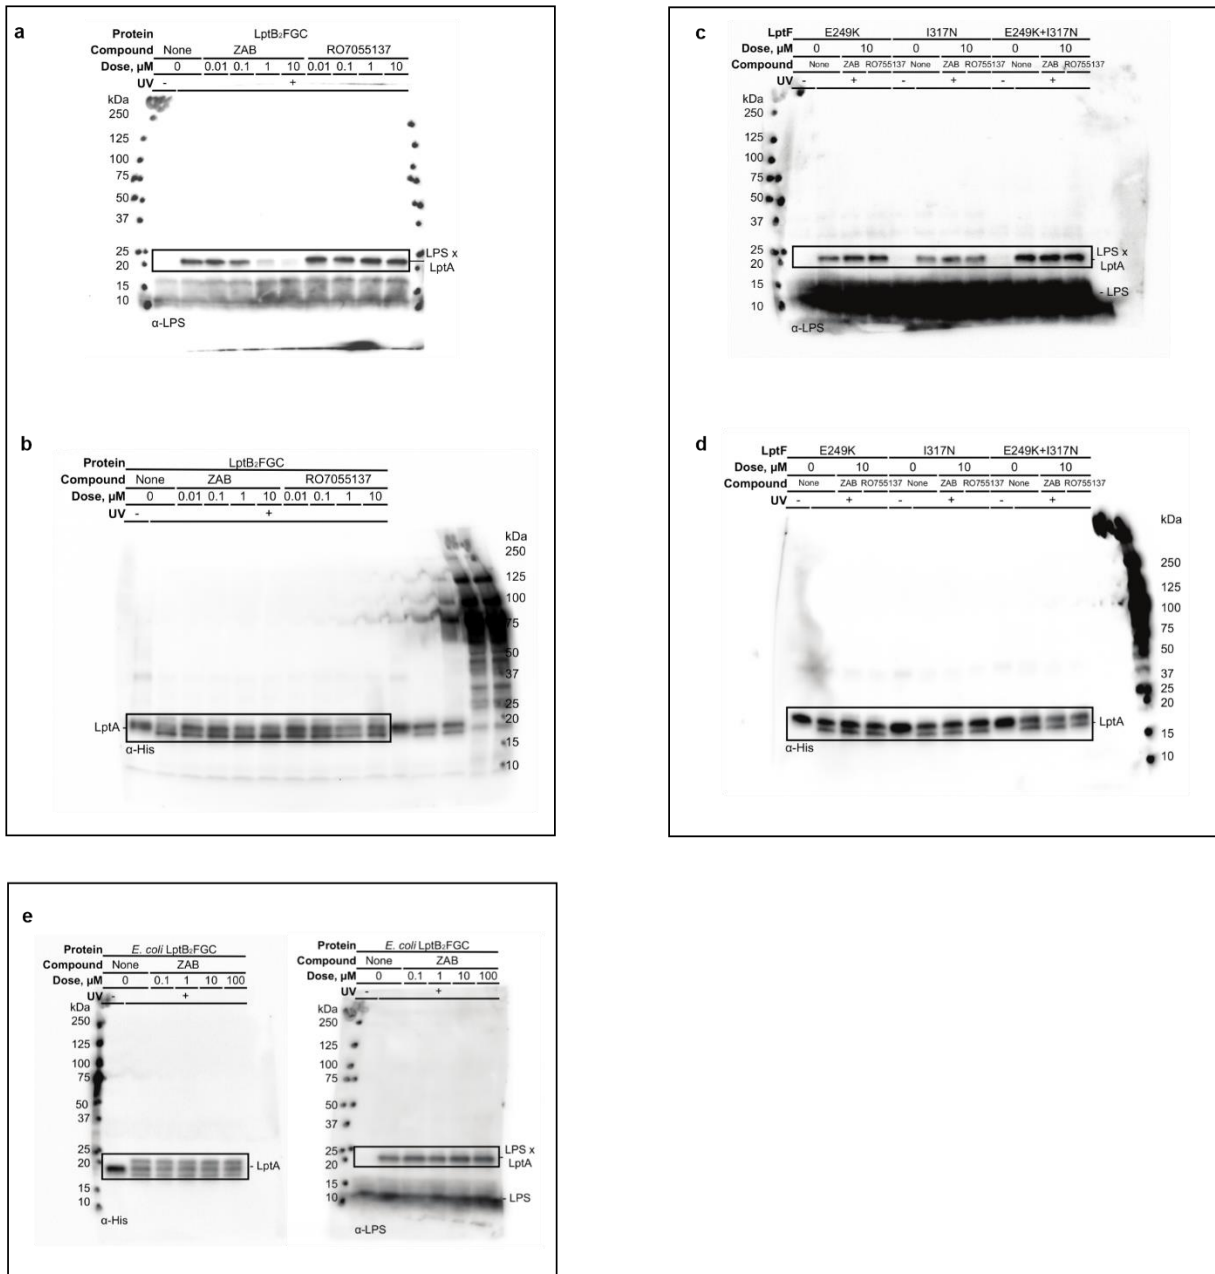

**Supplementary Fig. 1.** Biochemical assay uncropped immunoblots. Uncropped gels and blots for data shown in main-text (Fig. 3). For each figure, the cropped regions are denoted by boxes. **a**, **b**, **c** and **d**, source images of data shown in Fig. 3c, left top, left bottom, right top and right bottom respectively. Independent blots were probed for anti-LPS and anti-His. **e**, source images of data described in main text for the *E. coli* LptB<sub>2</sub>FGC control.
